# Supplementary material
Source: publisher figshare collection journal article supplement (https://karger.figshare.com/articles/dataset/_/5125627)

**Este questionário é anónimo,  
agradecemos antecipadamente a sua colaboração**

**Especialidade:** ☐ Neurologia ☐ Medicina Geral e Familiar

**Idade:** \_\_\_\_\_ anos

**Sexo:** ☐ F ☐ M

**Ano de licenciatura** \_\_\_\_\_

**Local de exercício da função:** ☐ Cidade ☐ Meio Rural

**Dentro da sua prática, a enxaqueca é uma patologia que lhe interessa especialmente?**

☐ Sim, muito ☐ Sim ☐ Não muito ☐ Mesmo nada

**Em média, quantos doentes com enxaqueca o consultam por mês?**

☐ 0-5 ☐ 6-10 ☐ 11-20 ☐ >20

### **Percepção da doença**

**Considera a enxaqueca uma doença na verdadeira acepção da palavra?**

☐ Sim ☐ Não

**Considera que a enxaqueca é uma patologia incapacitante?**

☐ Sim, muito ☐ Sim ☐ Não muito ☐ Mesmo nada

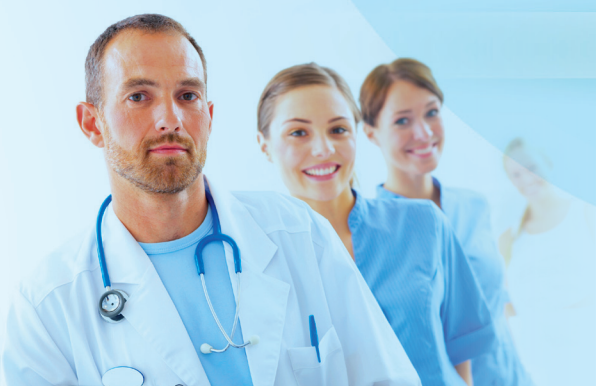

Os DALYs (Disability Adjusted Life Years) são a soma dos anos de vida potencial perdidos devido a mortalidade prematura com os anos de vida produtiva perdidos devido a incapacidade.

A tabela que se segue lista das 14 doenças neuropsiquiátricas com maior impacto em termos de DALYs, para todo o Mundo segundo o World Health Report da OMS em 2001, incluindo todos os grupos etários e ambos os géneros.

Pedimos-lhe que ordene as patologias seguintes de 1 a 14 por DALYs, sendo 1 a que pensa ter maior DALYs e 14 a menor.

ORDENAÇÃO (1 a 14)

|                                               |                       |
|-----------------------------------------------|-----------------------|
| Doença afectiva Bipolar .....                 | <input type="radio"/> |
| Depressão (unipolar) .....                    | <input type="radio"/> |
| Doenças associadas ao consumo de drogas ..... | <input type="radio"/> |
| Perturbação Pós-traumática .....              | <input type="radio"/> |
| Doença Obsessivo-compulsiva .....             | <input type="radio"/> |
| Doenças associadas ao abuso de álcool .....   | <input type="radio"/> |
| Alzheimer e outras Demências .....            | <input type="radio"/> |
| Enxaqueca .....                               | <input type="radio"/> |
| Perturbação do Pânico .....                   | <input type="radio"/> |
| Insónia (primária) .....                      | <input type="radio"/> |
| Esquizofrenia .....                           | <input type="radio"/> |
| Esclerose Múltipla .....                      | <input type="radio"/> |
| Epilepsia .....                               | <input type="radio"/> |
| Doença de Parkinson .....                     | <input type="radio"/> |

Considera que as expectativas do doente com enxaqueca são demasiado elevadas para a resposta que lhe pode dar?

☐ Sempre ☐ Muitas vezes ☐ Raramente ☐ Nunca

Está satisfeito com as opções actualmente disponíveis para o tratamento da crise de enxaqueca?

☐ Muito insatisfeito ☐ Insatisfeito  
☐ Satisfeito ☐ Muito satisfeito

Está satisfeito com as opções actualmente disponíveis para o tratamento preventivo da enxaqueca?

☐ Muito insatisfeito ☐ Insatisfeito  
☐ Satisfeito ☐ Muito satisfeito

Considera que o tratamento de um doente com enxaqueca consome demasiado tempo?

☐ Sempre ☐ Muitas vezes ☐ Raramente ☐ Nunca

É frequente o doente com enxaqueca apresentar co-morbilidades como ansiedade ou depressão, que dificultam o seu tratamento?

☐ Sempre ☐ Muitas vezes ☐ Raramente ☐ Nunca

Acha que há doentes com enxaqueca que o consultam devido a outras patologias mas não referem a enxaqueca?

☐ Sempre ☐ Muitas vezes ☐ Raramente ☐ Nunca

Pensa que o tratamento da enxaqueca é difícil porque o doente com enxaqueca é pouco assíduo e procura frequentemente diferentes médicos pelo mesmo motivo?

☐ Sim, muito ☐ Sim, um pouco ☐ Não muito ☐ Nada

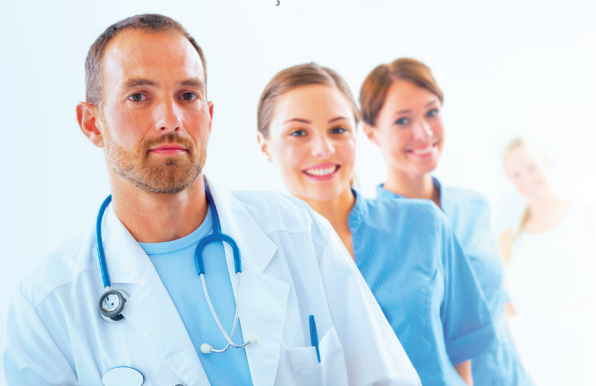

Parece-lhe difícil fazer o doente com enxaqueca aceitar que sofre de uma cefaleia primária e não de uma cefaleia secundária (por ex. secundária a um tumor cerebral ou a um aneurisma)?

- ☐ Sim, muito    ☐ Sim, um pouco    ☐ Não muito    ☐ Nada

Em relação ao tratamento da crise de enxaqueca, ordene por favor os critérios seguintes de acordo com a importância que lhes dá. (de 1-mais importante a 4-menos importante)

- ☐ Alívio rápido da dor  $\leq$  2h    ☐ Tolerabilidade  
☐ Toma única    ☐ Retoma rápida da actividade diária

Quando prescreve a um doente um tratamento preventivo, qual é a percentagem de eficácia na diminuição do número de crises que fixa como objectivo terapêutico ?

- ☐ 30%    ☐ 50%    ☐ 70%    ☐ 90%

Revê sistematicamente os seus doentes depois de uma primeira consulta?

- ☐ Sempre    ☐ Muitas vezes    ☐ Raramente    ☐ Nunca

As perguntas que se seguem referem-se às suas dores de cabeça

Alguma vez na sua vida sofreu de dores de cabeça de qualquer tipo ?

- ☐ Sim    ☐ Não

Durante o ultimo ano teve alguma dor de cabeça de qualquer tipo?

- ☐ Sim    ☐ Não

Se respondeu negativamente a ambas as perguntas, agradecemos desde já a sua participação.

Se respondeu afirmativamente a alguma das duas perguntas, agradecemos que continue o questionário

Com que frequência tem habitualmente dores de cabeça?

- ☐ Todos os dias    \_\_\_\_\_ dias por mês    \_\_\_\_\_ dias por ano

Teve uma dor de cabeça ontem?

- ☐ Sim    ☐ Não

SE SIM,

- Quanto tempo durou?

- ☐ Todo o dia    ☐ \_\_\_\_\_ horas    ☐ \_\_\_\_\_ minutos

- Qual foi a sua intensidade?

- ☐ Ligeira    ☐ Moderada    ☐ Intensa

- Afectou a sua capacidade de realizar as suas tarefas diárias (tudo aquilo que teria feito normalmente ontem)?

- ☐ Fiz tudo como normal    ☐ Não consegui fazer algumas coisas    ☐ Não consegui fazer nada

- Agora pense naquilo que poderia ter feito ontem se não tivesse tido uma dor de cabeça. De tudo o que poderia ter feito, quanto é que efectivamente fez?

- ☐ Nada    ☐ Menos de metade    ☐ Mais de metade    ☐ Tudo

Durante **os últimos 3 meses**, ocorreu algum dos seguintes sintomas com as suas dores de cabeça?

|                                                                                                                                          | Sim                   | Não                   |
|------------------------------------------------------------------------------------------------------------------------------------------|-----------------------|-----------------------|
| Sentiu-se nauseada(o) ou mal disposta(o) enquanto estava com dor de cabeça ?                                                             | <input type="radio"/> | <input type="radio"/> |
| A luz incomodou-a(o) (muito mais do que quando não tem dor de cabeça)?                                                                   | <input type="radio"/> | <input type="radio"/> |
| As suas dores de cabeça limitaram a sua capacidade de trabalhar, estudar, ou fazer o que precisava de fazer durante, pelo menos, um dia? | <input type="radio"/> | <input type="radio"/> |



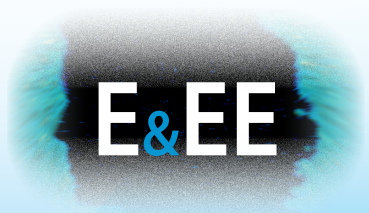

ENXAQUECA E A ENXAQUECA DO ESPECIALISTA  
DADOS SOBRE A PERCEPÇÃO E TRATAMENTO

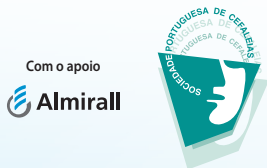

As perguntas abaixo, referem-se às dores de cabeça, ou episódios de enxaqueca sem dor de cabeça, que possa ter sentido na sua vida.

|                                                                               | Sim                   | Não                   |
|-------------------------------------------------------------------------------|-----------------------|-----------------------|
| Tem dores de cabeça frequentes ou intensas?                                   | <input type="radio"/> | <input type="radio"/> |
| As suas dores de cabeça costumam durar mais de 4 horas?                       | <input type="radio"/> | <input type="radio"/> |
| Costuma ficar enjoado(a) quando tem uma dor de cabeça?                        | <input type="radio"/> | <input type="radio"/> |
| A luz ou barulho incomodam-no(a), quando tem dor de cabeça?                   | <input type="radio"/> | <input type="radio"/> |
| A dor de cabeça limita qualquer das suas actividades físicas ou intelectuais? | <input type="radio"/> | <input type="radio"/> |

Tem alguém próximo (familiar/amigo próximo) que sofra de enxaqueca? ☐ Sim ☐ Não

Sofre de enxaqueca? ☐ Sim ☐ Não

Se sofre de enxaqueca agradecemos que continue o questionário.

Se não sofre de enxaqueca agradecemos desde já a sua colaboração

Características da enxaqueca

Com o objectivo de completar os dados epidemiológicos referentes às características mais habituais das suas crises de enxaqueca, agradecemos a sua resposta às questões seguintes

Desde que idade sofre de enxaqueca? \_\_\_\_\_ anos

Sem qualquer tratamento, a sua enxaqueca tem uma duração que pode ir de 4 horas até 3 dias? ☐ Sim ☐ Não

Sem qualquer tratamento, qual é a duração mais habitual da sua crise de enxaqueca?  
☐ 4-12 horas ☐ 12-24horas ☐ 24-48 horas ☐ 48-72 horas

Já teve pelo menos 5 crises de enxaqueca durante a sua vida? ☐ Sim ☐ Não

A sua dor durante a crise de enxaqueca é: ☐ Unilateral ☐ Bilateral

A sua dor é de tipo: ☐ Pulsátil ou latejante ☐ Pressão, peso ou aperto  
☐ Picadas, guinadas ☐ Outro tipo de dor

A dor intensifica-se com o esforço ou as actividades físicas de rotina (subir escadas, andar depressa), ou durante a dor evita fazer qualquer esforço, por mínimo que seja?  
☐ Sim ☐ Não

Qual é habitualmente a intensidade da sua dor?  
☐ Ligeira, permitindo-me manter as minhas actividades habituais apesar da dor  
☐ Moderada, impedindo-me de efectuar as minhas actividades/ tarefas habituais da forma normal isto é, a dor interfere com o meu trabalho ou actividades mas consigo continuar a funcionar  
☐ Grave, habitualmente não consigo funcionar e tenho que me retirar, ir para casa ou para o hospital.

Durante as crises de enxaqueca costuma ter náuseas ou ficar enjoado e, eventualmente, vomitar mesmo? ☐ Sim ☐ Não

Durante as crises de enxaqueca costuma ficar incomodado com a luz e com o som? ☐ Sim ☐ Não

| Quando está com dores de cabeça:                               | Muitas vezes          | Algumas vezes         | Não                   |
|----------------------------------------------------------------|-----------------------|-----------------------|-----------------------|
| Sente-se confuso/a?                                            | <input type="radio"/> | <input type="radio"/> | <input type="radio"/> |
| Custa-lhe efectuar tarefas com a velocidade normal?            | <input type="radio"/> | <input type="radio"/> | <input type="radio"/> |
| Tem dificuldade em seguir um trajecto (a conduzir ou a andar)? | <input type="radio"/> | <input type="radio"/> | <input type="radio"/> |
| Tem dificuldade em pensar?                                     | <input type="radio"/> | <input type="radio"/> | <input type="radio"/> |
| Custa-lhe manter uma linha de pensamento?                      | <input type="radio"/> | <input type="radio"/> | <input type="radio"/> |
| Tem dificuldade em compreender as palavras que lhe dizem?      | <input type="radio"/> | <input type="radio"/> | <input type="radio"/> |
| Tem dificuldade em organizar uma frase ou uma conversa?        | <input type="radio"/> | <input type="radio"/> | <input type="radio"/> |
| Tem dificuldade em dizer nomes das pessoas?                    | <input type="radio"/> | <input type="radio"/> | <input type="radio"/> |
| Tem dificuldade em lembrar-se do nome correcto dos objectos?   | <input type="radio"/> | <input type="radio"/> | <input type="radio"/> |

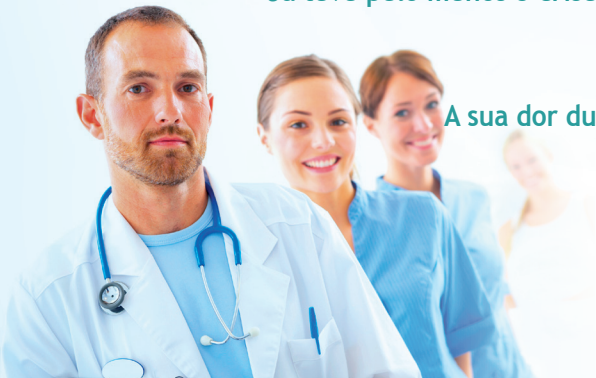

De que tipo são as suas crises de enxaqueca?

- ☐ Sempre com aura   ☐ Sempre sem aura   ☐ Com e sem aura

Se é uma mulher, as crises de enxaqueca estão relacionadas com o ciclo menstrual?

- ☐ Sim, unicamente   ☐ Sim, frequentemente   ☐ Não

Entre as suas crises mais fortes, é habitual ter outras dores de cabeça mais fracas?

- ☐ Sim   ☐ Não

Se sim, quais são as características sintomatológicas dessas dores de cabeça mais fracas?

- ☐ Principalmente tipo enxaqueca   ☐ Principalmente tipo cefaleia de tensão  
☐ Outro \_\_\_\_\_

Qual a frequência habitual das suas crises de enxaqueca?

- ☐ Menos de 1 vez por mês   ☐ 1-4 vezes por mês   ☐ Mais de 4 vezes por mês

### Impacto da enxaqueca na sua vida

Nos últimos 3 meses quantas crises teve? \_\_\_\_\_

Por favor, responda às seguintes perguntas sobre TODAS as cefaleias que teve nos últimos 3 meses. Escreva a sua resposta a seguir a cada pergunta. Escreva 0 (zero) se não efectuou a actividade referida nos últimos 3 meses. (Se necessário, recorra a um calendário).

Em quantos dias nos últimos 3 meses teve de faltar ao emprego devido às cefaleias? \_\_\_\_\_

Quando ainda conseguiu ir trabalhar, em quantos dias nos últimos 3 meses a sua produtividade esteve reduzida a metade ou mais, devido às cefaleias?  
(sem contar com os dias que considerou na pergunta anterior) \_\_\_\_\_

Em quantos dias, nos últimos 3 meses, teve de deixar de fazer os seus trabalhos domésticos por causa das cefaleias? \_\_\_\_\_

Quando ainda foi capaz de fazer os seus trabalhos domésticos, em quantos dias, nos últimos 3 meses, esteve a sua produtividade reduzida a metade ou mais devido à enxaqueca?  
(sem contar com os dias que considerou na pergunta anterior) \_\_\_\_\_

Em quantos dias, nos últimos 3 meses, teve de faltar a actividades com a sua família, actividades sociais ou de tempos livres por causa das cefaleias? \_\_\_\_\_

Quando ainda foi capaz de continuar as suas actividades familiares, sociais e de tempos livres, em quantos dias a enxaqueca as tornou desconfortáveis?  
(sem contar com os dias que considerou na pergunta anterior) \_\_\_\_\_

Acha que sua enxaqueca influencia a sua forma de tratar os doentes com enxaqueca?

- ☐ Sim   ☐ Não

Acha que sua enxaqueca influencia a sua percepção em relação aos doentes com enxaqueca?

- ☐ Sim   ☐ Não

Partilha espontaneamente o facto de sofrer de enxaqueca com os seus doentes com enxaqueca?

- ☐ Sim   ☐ Algumas vezes   ☐ Não

Se não, fá-lo no caso de ser questionado pelo doente?

- ☐ Sim   ☐ Não



## Tratamento da enxaqueca

## Tratamento da crise

Que medicamento(s) utiliza para tratar as suas crises de enxaqueca?  
(é possível mais do que uma resposta)

- ☐ 1. paracetamol ☐ 2. aspirina ☐ 3. ibuprofeno  
☐ 4. naproxeno ☐ 5. outros AINE ☐ 6. derivados de ergotamina orais  
☐ 7. analgésicos em combinação ☐ 8. antieméticos  
☐ 9. triptanos (especifique) \_\_\_\_\_ ☐ 10. outros (especifique) \_\_\_\_\_

De entre os medicamentos acima, qual o que utiliza mais frequentemente para tratar as suas crises de enxaqueca? (Indique por favor o número correspondente, indique apenas uma resposta): Nº \_\_\_\_\_

Qual é o seu grau de satisfação no que diz respeito ao medicamento que indicou?

- ☐ Muito insatisfeito ☐ Insatisfeito ☐ Satisfeito ☐ Muito satisfeito

Marque na escala abaixo, com um traço vertical, o seu grau de satisfação?

Muito insatisfeito \_\_\_\_\_ Muito satisfeito

Consegue um alívio significativo da dor 2 horas após a toma deste medicamento? ☐ Sim ☐ Não

Tolera bem este medicamento? ☐ Sim ☐ Não

Utiliza uma toma única deste medicamento (por crise)? ☐ Sim ☐ Não, nº de tomas \_\_\_\_\_

Este medicamento permite-lhe retomar rapidamente as suas actividades habituais?

- ☐ Sim ☐ A maior parte das vezes ☐ Raramente ☐ Não

## Tratamento preventivo

Utiliza um tratamento de prevenção para a sua enxaqueca?

- ☐ Sim ☐ Não

Se sim, qual?

## Antiepiléticos

- ☐ Valproato de sódio ☐ Topiramato  
☐ Outros (especifique) \_\_\_\_\_;

## Anti-depressivos

- ☐ Amitriptilina ☐ Fluoxetina  
☐ Outros (especifique) \_\_\_\_\_;

## Antihipertensores

- ☐ Inderal ☐ Verapamil  
☐ Outros (especifique) \_\_\_\_\_;

## Outros anti-migranosos

- ☐ Oxitriptano ☐ Mesilato de dihidroergotamina ☐ Flunarizina \_\_\_\_\_;  
☐ outros (especifique) \_\_\_\_\_

Desde quando: \_\_\_\_\_ meses

Tem um registo ou diário das suas crises de enxaqueca?

- ☐ Sim ☐ Não

**Avaliação do consumo de medicamentos**

Nos últimos 3 meses, para tratar a sua enxaqueca ou outras cefaleias, tomou de forma regular um ou mais dos seguintes medicamentos?

- |                                                                                                                     |                                            |                                            |
|---------------------------------------------------------------------------------------------------------------------|--------------------------------------------|--------------------------------------------|
| <input type="radio"/> Paracetamol                                                                                   | <input type="radio"/> menos de 15 dias/mês | <input type="radio"/> 15 ou mais dias/mês  |
| <input type="radio"/> Aspirina                                                                                      | <input type="radio"/> menos de 15 dias/mês | <input type="radio"/> 15 ou mais dias/mês  |
| <input type="radio"/> AINE                                                                                          | <input type="radio"/> menos de 15 dias/mês | <input type="radio"/> 15 ou mais dias/mês  |
| <input type="radio"/> Triptanos                                                                                     | <input type="radio"/> menos de 10 dias/mês | <input type="radio"/> 10 ou mais dias/ mês |
| <input type="radio"/> Derivados da ergotamina                                                                       | <input type="radio"/> menos de 10 dias/mês | <input type="radio"/> 10 ou mais dias/mês  |
| <input type="radio"/> Derivados opióides                                                                            | <input type="radio"/> menos de 10 dias/mês | <input type="radio"/> 10 ou mais dias/mês  |
| <input type="radio"/> Associações de medicamentos contendo vários princípios activos ou toma de vários medicamentos | <input type="radio"/> menos de 10 dias/mês | <input type="radio"/> 10 ou mais dias/mês  |
| <input type="radio"/> Outros (especifique) _____                                                                    | <input type="radio"/> Média/mês _____ dias |                                            |

**Muito obrigado pela sua participação**

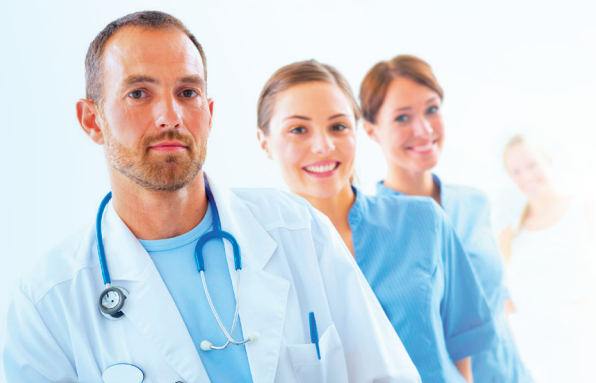

Supplement: Supplementary file 1 [file 1]
